# Supplementary material for: TCDD Induces the Hypoxia-Inducible Factor (HIF)-1α Regulatory Pathway in Human Trophoblastic JAR Cells
Source: MDPI journal article supplement (doi:10.3390/ijms151017733), 2014-09-30

# Supplementary Information

**Figure S1.** PD98059 treatment inhibited the TCDD-induced MEK phosphorylation. Cells were pre-treated with PD98059 (MAPK kinase (MEK) inhibitor) for 30 min and then incubated with 2 nM TCDD for 1 h. PD98059 significantly reduced the levels of MEK phosphorylation in a dose-dependent manner. No significant inhibitory effects on the TCDD-induced HIF-1 $\alpha$  stabilization were found with PD98059 pretreatment.

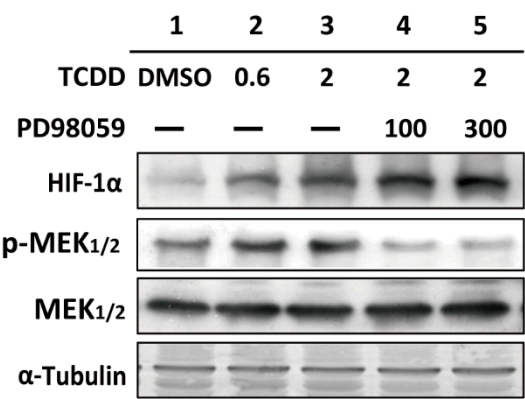

Supplement: s1 [file s1]
